# Supplementary material
Source: MDPI journal article supplement (https://www.mdpi.com/2226-471X/6/2/85)

# Cartoon Strip

Page 1

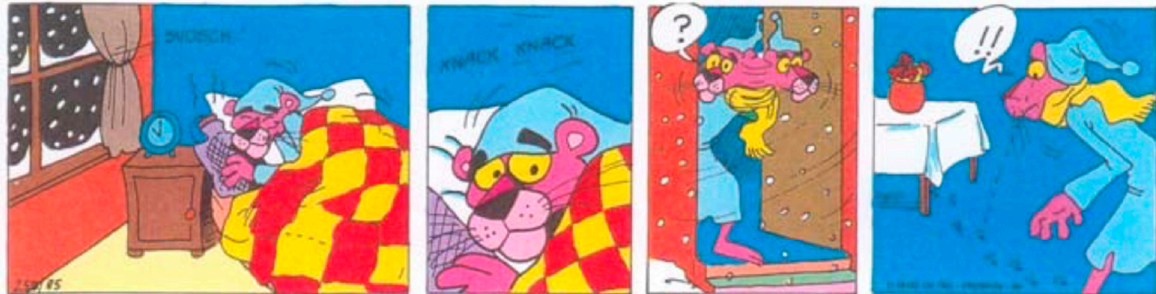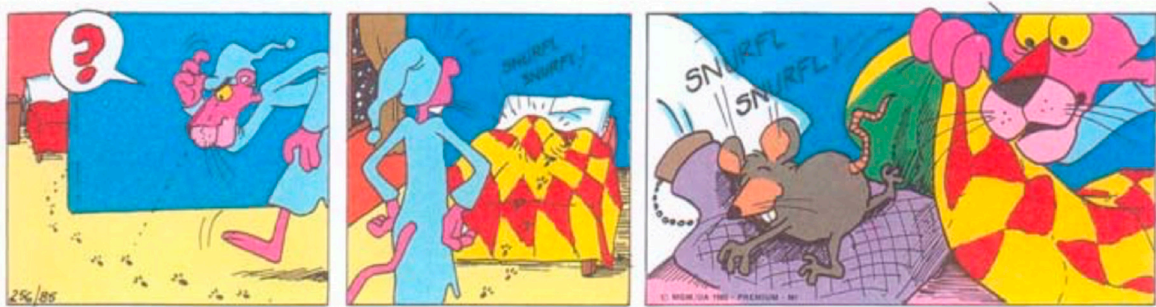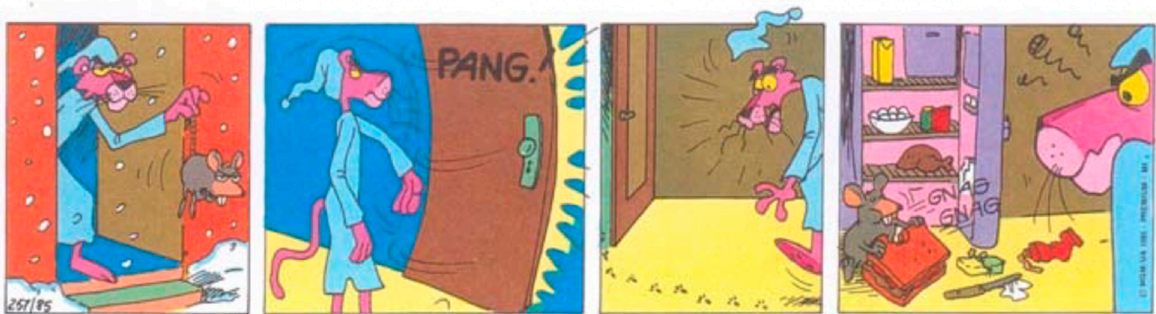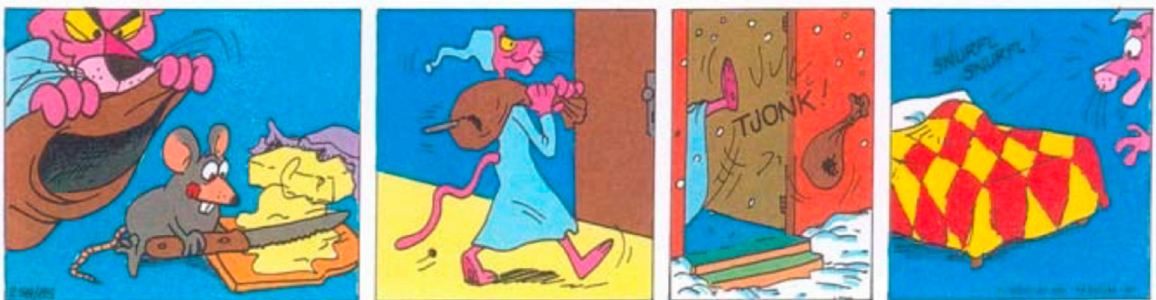



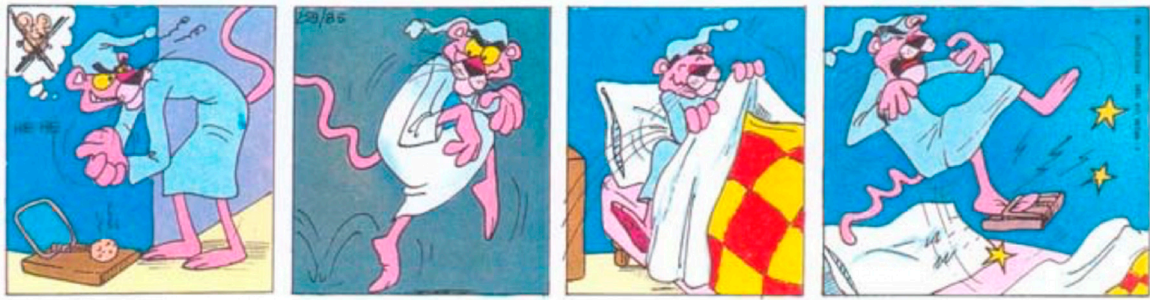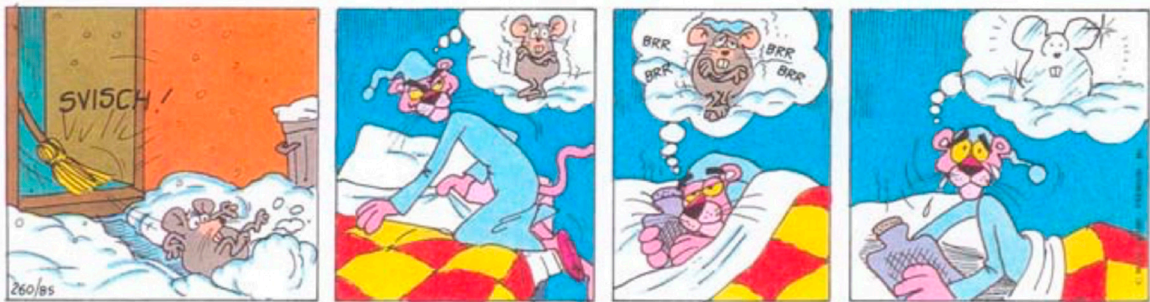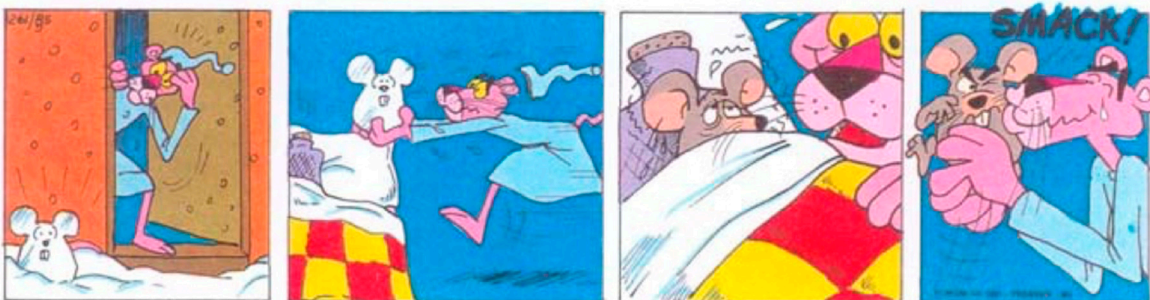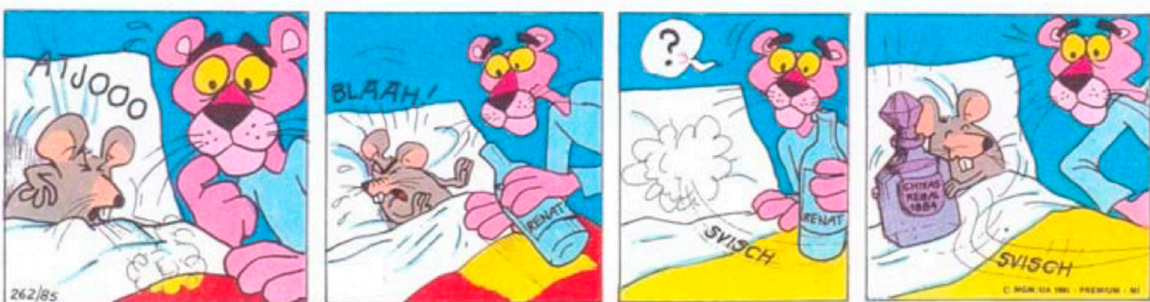

Supplement: s1 [file s1]
